# Supplementary material for: The use of time resolved aerosol assisted chemical vapour deposition in mapping metal oxide thin film growth and fine tuning functional properties
Source: Royal Society of Chemistry journal article supplement (doi:10.1039/c4ta05922k), 2014-12-01
Supplement: c4ta05922k1.pdf [file c4ta05922k1.pdf]

## Electronic Supplementary Information (ESI)

# The Use of Time Resolved Aerosol Assisted Chemical Vapour Deposition in Mapping Metal Oxide Thin Film Growth and Fine Tuning Functional Properties

*Nicholas P. Chadwick<sup>a</sup>, Sanjayan Sathasivam<sup>ab</sup>, Salem M. Bawaked<sup>c</sup>, Mohamed Mokhtar<sup>c</sup>, Shaeel A. Althabaiti<sup>c</sup>, Sulaiman N. Basahel<sup>c</sup>, Ivan P. Parkin<sup>a</sup> and Claire J. Carmalt<sup>a\*</sup>*

A - Materials Chemistry Research Centre, Department of Chemistry, University College London, 20 Gordon Street, London, U.K. WC1H 0AJ

E-mail: [c.j.carmalt@ucl.ac.uk](mailto:c.j.carmalt@ucl.ac.uk)

B - The Gridiron Building, One Pancras Square, London, N1C 4AG.

C - Chemistry Department, King Abdulaziz University, Saudi Arabia

Keywords: SnO<sub>2</sub>, TiO<sub>2</sub>, AACVD, functional properties, mapping

## Supplementary Figures

### XPS

Samples oxygen 1s XPS spectrums are provided below to demonstrate the presence of a peak at 530.1 eV from 12 minutes onwards which represents a Sn-O-Ti linkage, indicating Sn as a substitutional dopant.

**Figure S1: 3 mins**

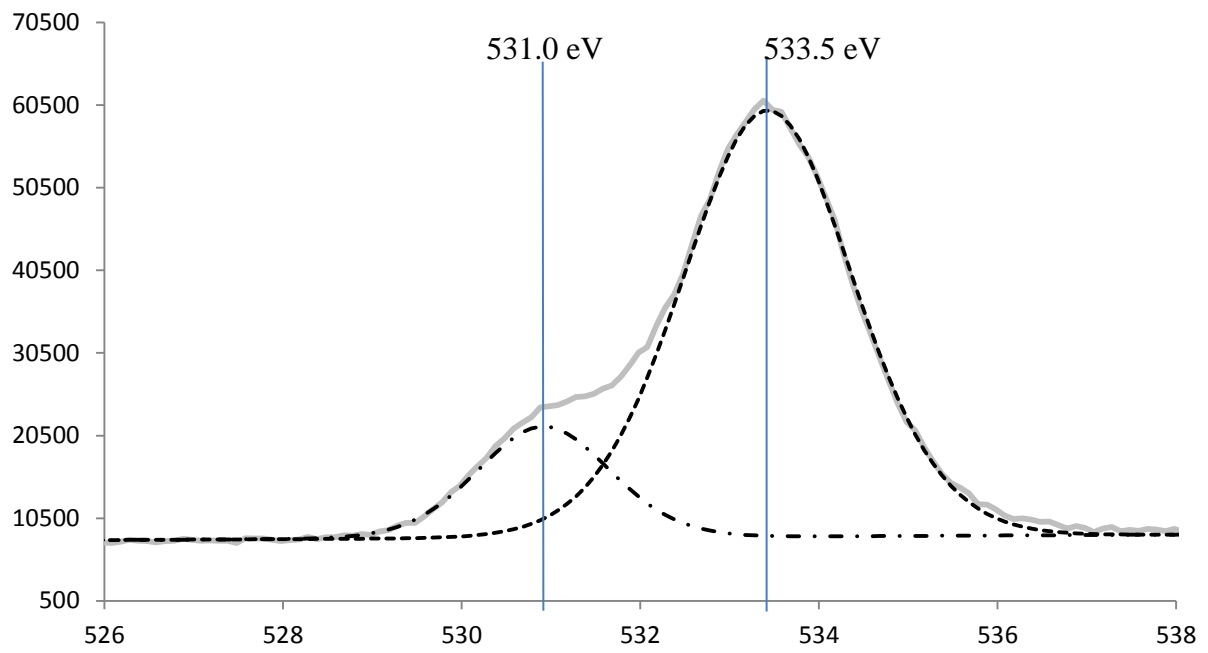

Modelled XPS peaks for 1s Oxygen peaks after 200 seconds of sputtering after 3 minutes of deposition at 450 °C by AACVD.

**Figure S2: 6 mins**

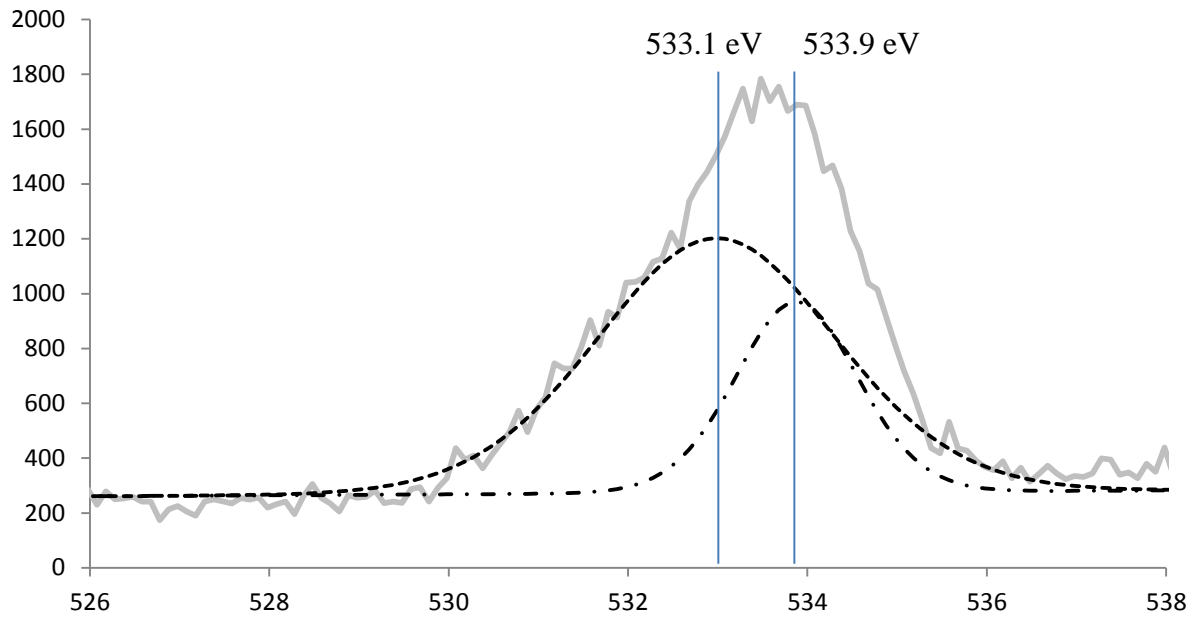

Modelled XPS peaks for 1s Oxygen peaks after 200 seconds of sputtering after 6 minutes of deposition at 450 °C by AACVD.

**Figure S3: 9 mins**

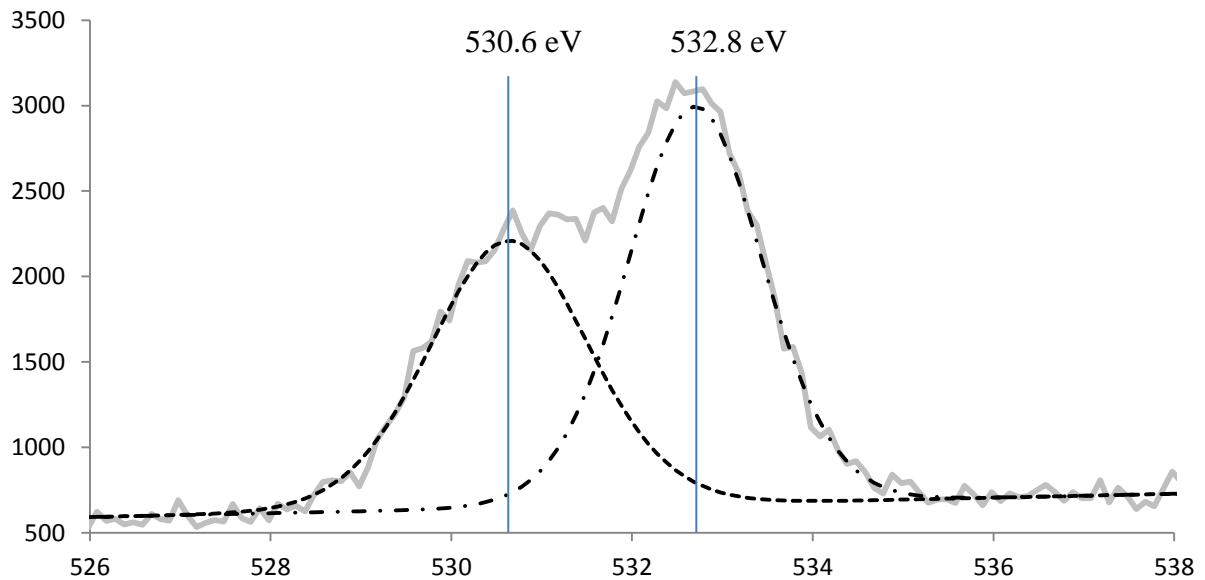

Modelled XPS peaks for 1s Oxygen peaks after 200 seconds of sputtering after 9 minutes of deposition at 450 °C by AACVD.

**Figure S4: 12 mins**

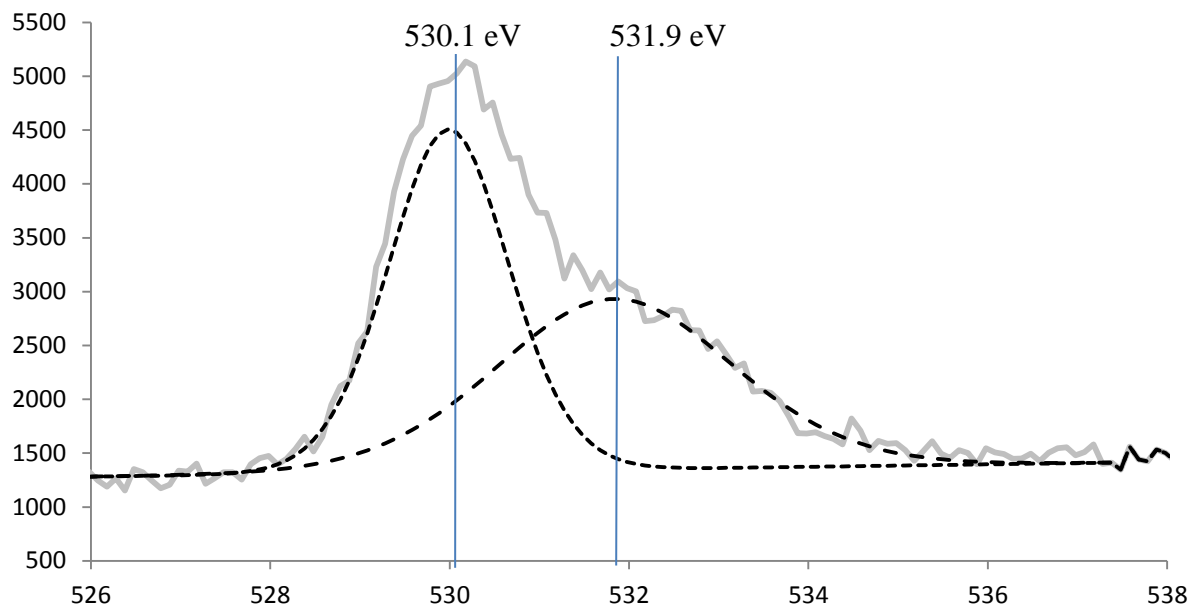

Modelled XPS peaks for 1s Oxygen peaks after 200 seconds of sputtering after 12 minutes of deposition at 450 °C by AACVD.

**Figure S5: 15 mins**

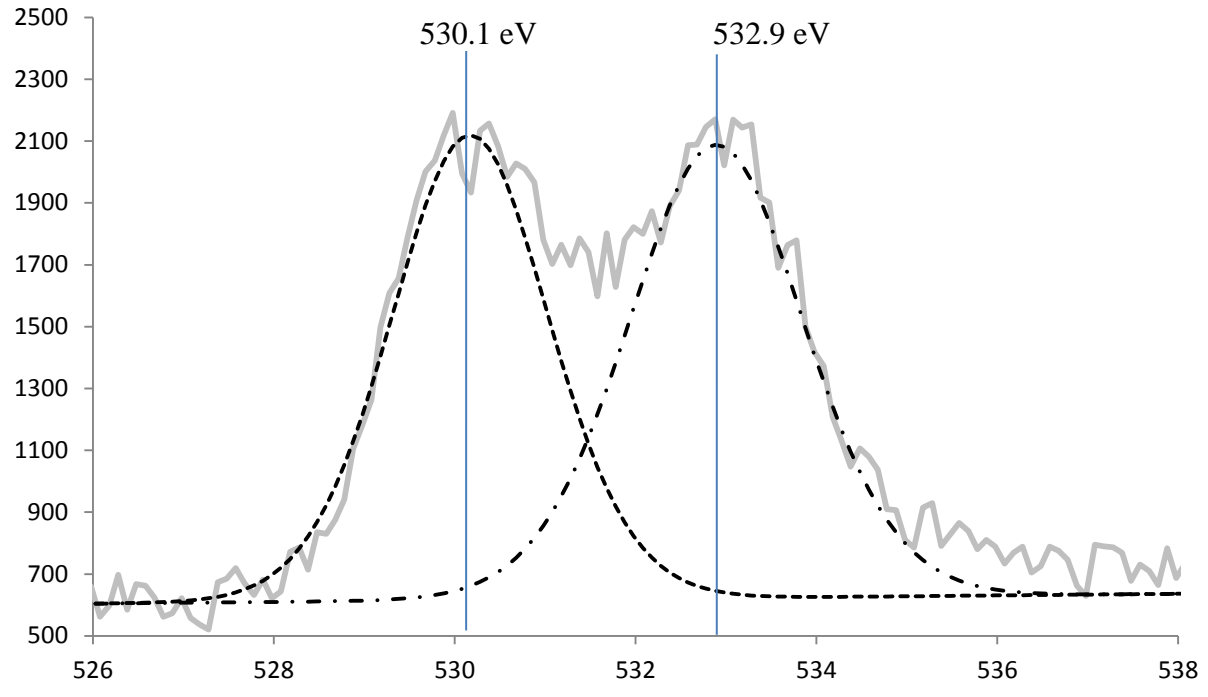

Modelled XPS peaks for 1s Oxygen peaks after 200 seconds of sputtering after 15 minutes of deposition at 450 °C by AACVD.

**Figure S6: 18 mins**

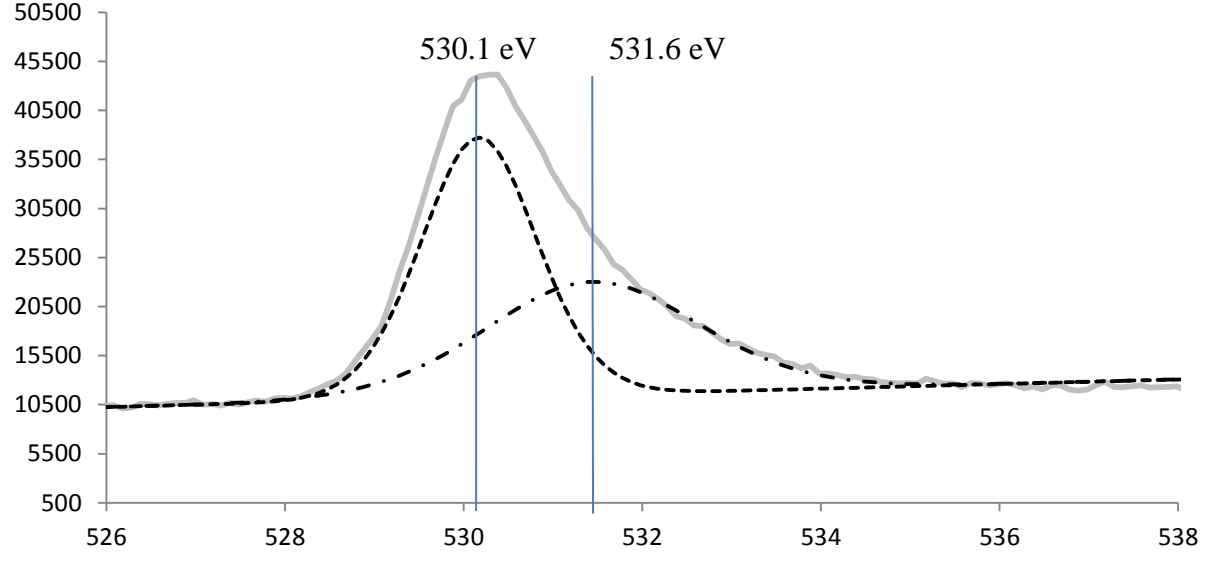

Modelled XPS peaks for 1s Oxygen peaks after 200 seconds of sputtering after 18 minutes of deposition at 450 °C by AACVD.

**Figure S7: 21 mins**

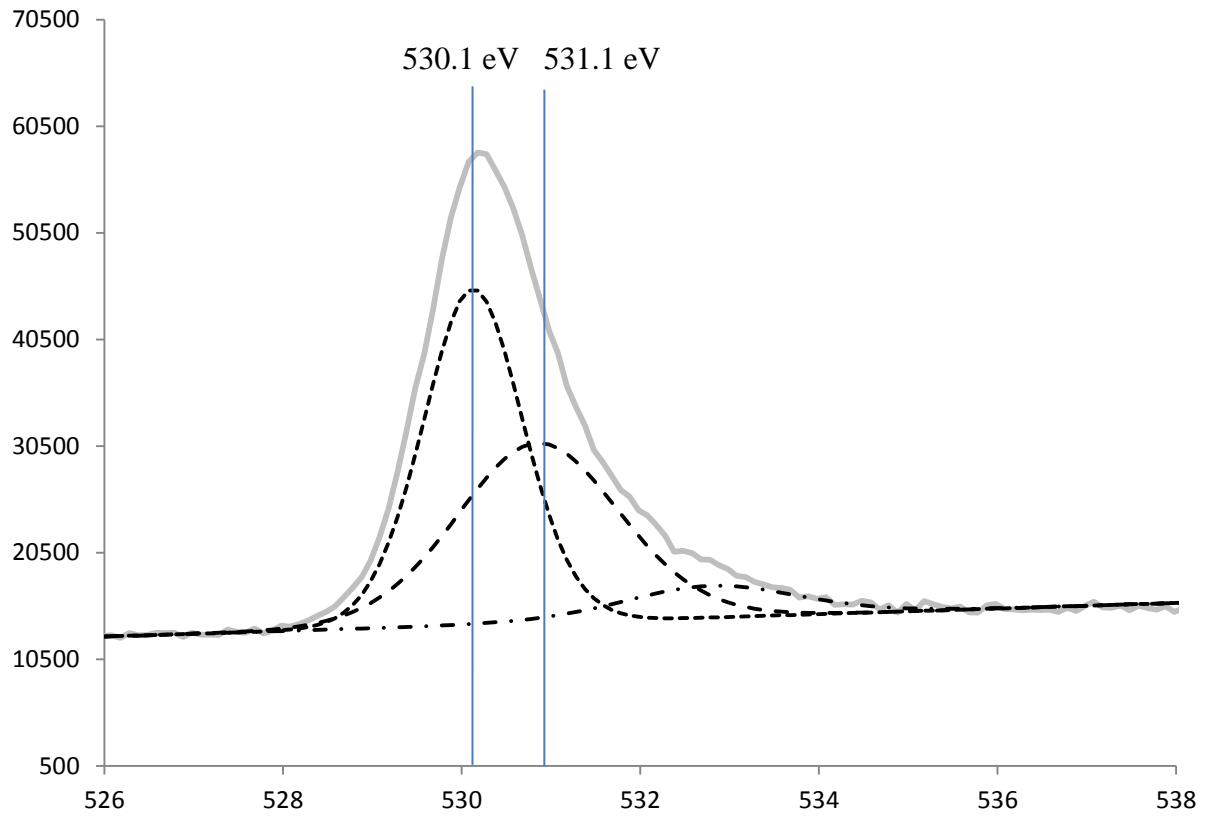

Modelled XPS peaks for 1s Oxygen peaks after 200 seconds of sputtering after 21 minutes of deposition at 450 °C by AACVD.

## Ultraviolet- Visible Absorption Spectroscopy

Absorption, transmission and Tauc plot band gap analysis are provided below.

**Figure S8: Absorption**

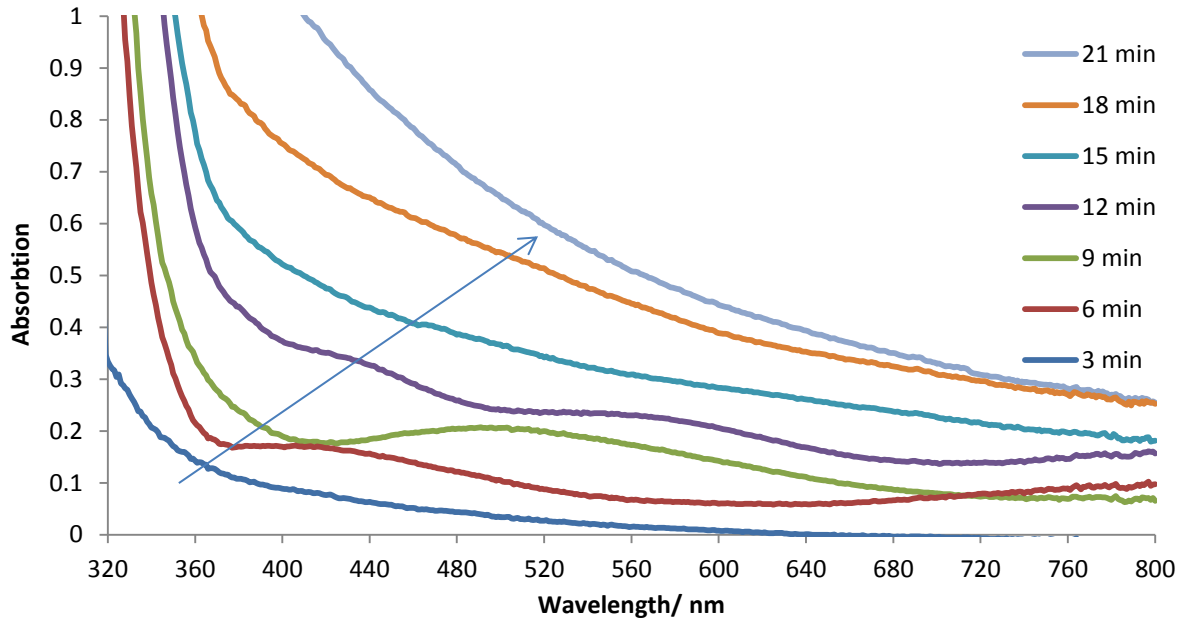

Absorption spectra for all time resolved samples deposited at 450 °C by AACVD. It is apparent that as respective deposition time increases samples permit less and less light to permeate through their structure.

**Figure S9: Transmission**

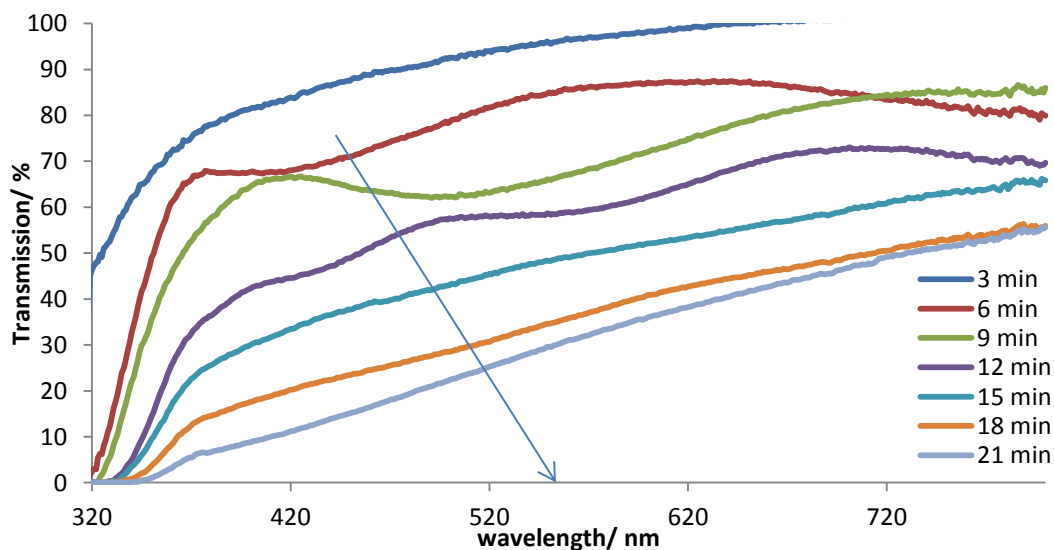

Transmission data for all time resolved samples deposited at 450 °C by AACVD. Transmission appears to decrease as deposition time increases; verifying, on a qualitative level, that film thickness increases as deposition time increases.

**Figure S10: Band Gaps**

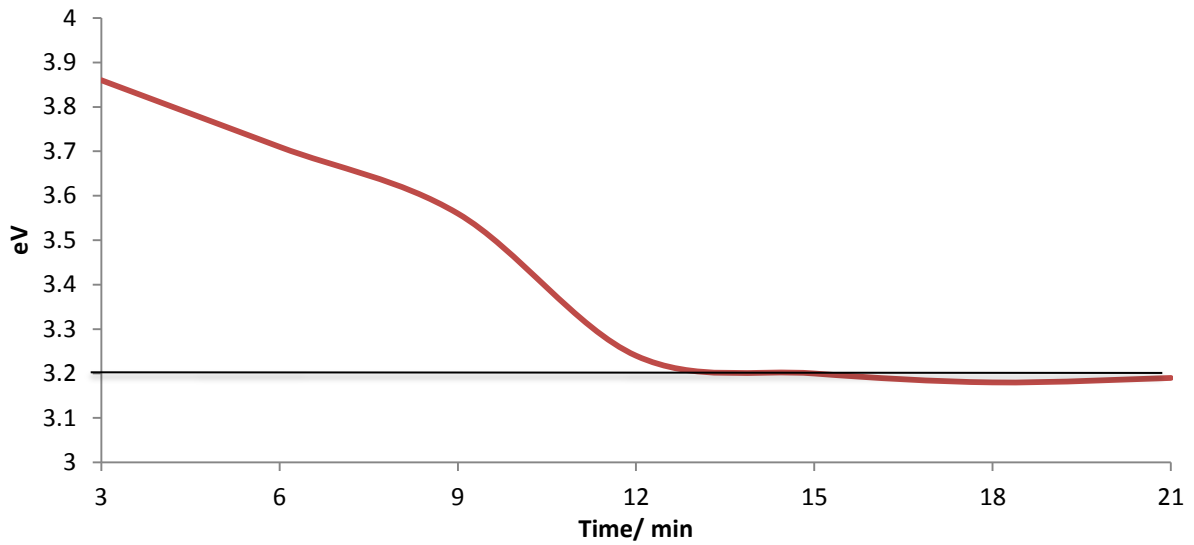

A graph charting the change in band gaps of the  $\text{TiO}_2/\text{SnO}_2$  composite material over time throughout the deposition process. Because the band gap is found to rest and stabilise at 3.2 eV for most samples, changes in absorption data cannot be attributed to red-shifting of spectra but to film thickness increasing.

### Film Thickness

Film thickness chart which displays the linear fashion in which the film thickness increased over time in the deposition.

**Figure S11:**

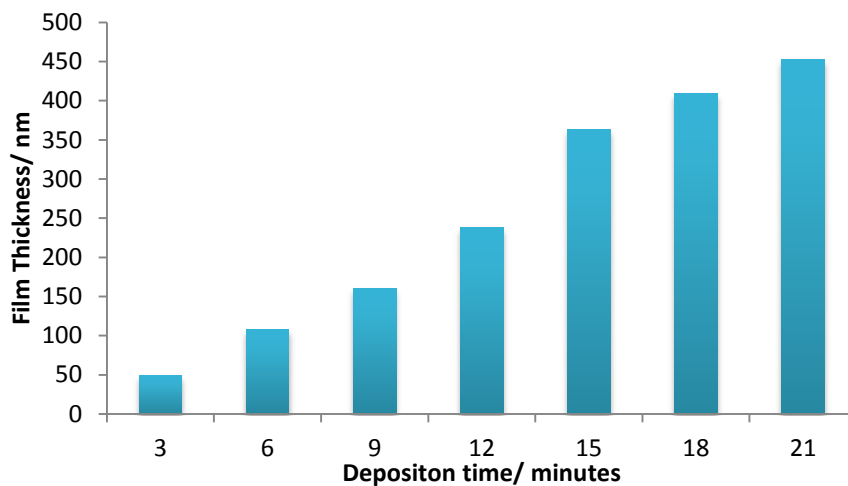

Thin film thickness as a result of time in the deposition of titanium isopropoxide and tin butyl trichloride at  $450^\circ\text{C}$  by AACVD. Film thickness is seen to increase in a linear fashion proportionally with deposition time indicating that both the precursor stream is roughly constant in intensity and also identity.
